# Supplementary material for: An enhanced electrocatalytic oxygen evolution reaction by the photothermal effect and its induced micro-electric field
Source: Royal Society of Chemistry journal article supplement (doi:10.1039/d4nr00170b), 2024-01-01
Supplement: d4nr00170b2.pdf [file d4nr00170b2.pdf]

## Electronic Supplementary Information

### **Enhanced Electrocatalytic Oxygen Evolution Reaction by Photothermal Effect and Its Induced Micro-electric Field**

Feng Duan,<sup>a</sup> Qian Zou,<sup>a</sup> Junzhe Li,<sup>a</sup> Xiaozhi Yuan,<sup>a</sup> Xun Cui,<sup>c</sup> Chuan Jing,<sup>d</sup> Shengrong  
Tao,<sup>d</sup> Xijun Wei,<sup>\*a</sup> Huichao He<sup>\*b</sup> and Yingze Song<sup>\*a</sup>

<sup>a</sup>*State Key Laboratory of Environment-Friendly Energy Materials, School of Materials  
and Chemistry, Engineering Research Center of Biomass Materials, Ministry of  
Education, Southwest University of Science and Technology, Mianyang 621010, P. R.  
China.*

<sup>b</sup>*Institute of Environmental Energy Materials and Intelligent Devices, School of  
Metallurgy and Materials Engineering, Chongqing University of Science and  
Technology, Chongqing 401331, P. R. China.*

<sup>c</sup>*State Key Laboratory of New Textile Materials and Advanced Processing Technologies,  
Wuhan Textile University, Wuhan 430200, P. R. China.*

<sup>d</sup>*College of Science, Chongqing University of Posts and Telecommunications, Chongqing  
400065, P. R. China*

\*Email: [xijunwei1992@swust.edu.cn](mailto:xijunwei1992@swust.edu.cn) (Xijun Wei)

\*Email: [hehuichao@cqust.edu.cn](mailto:hehuichao@cqust.edu.cn) (Huichao He)

\*Email: [yzsong@swust.edu.cn](mailto:yzsong@swust.edu.cn) (Yingze Song)

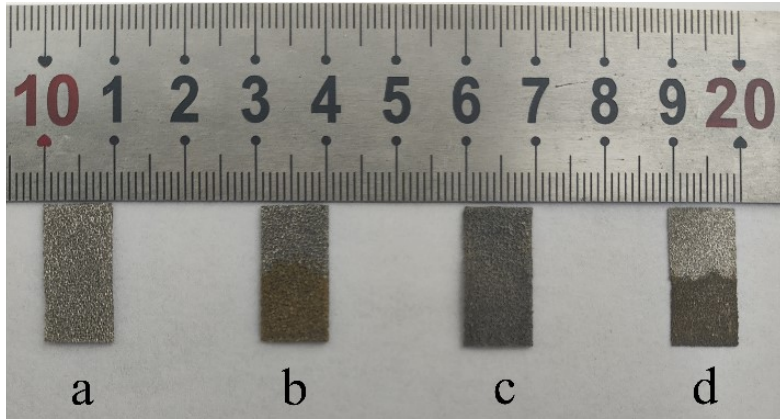

**Fig. S1** The electrode pictures of (a) nickel foam (NF), (b) NiFe(OH)<sub>y</sub>/NF, (c) NiS<sub>x</sub>/NF and (d) NiS<sub>x</sub>@NiFe(OH)<sub>y</sub>/NF.

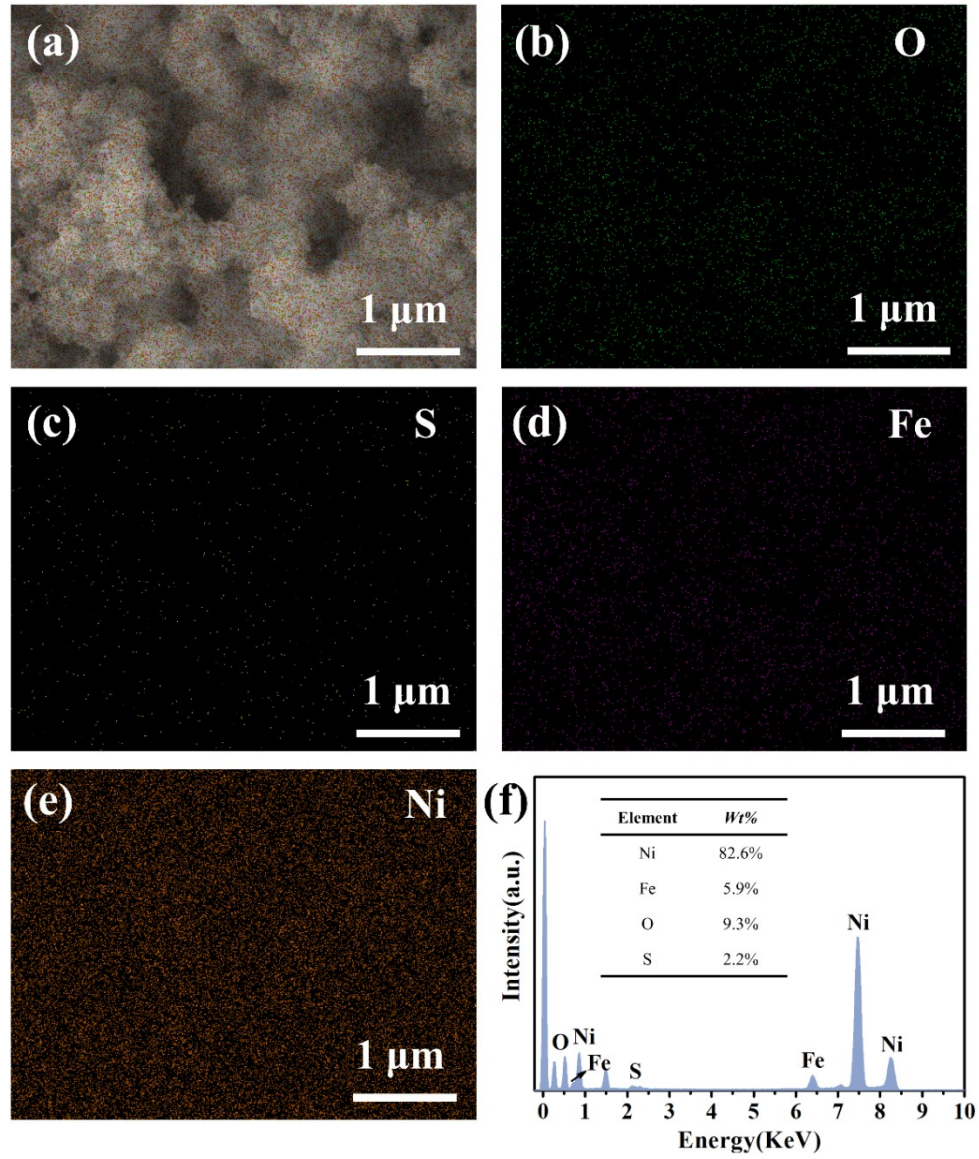

**Fig. S2** (a)-(e) EDS mapping for  $\text{NiS}_x@ \text{NiFe(OH)}_y/\text{NF}$ , (f) EDS analysis result of  $\text{NiS}_x@ \text{NiFe(OH)}_y/\text{NF}$ .

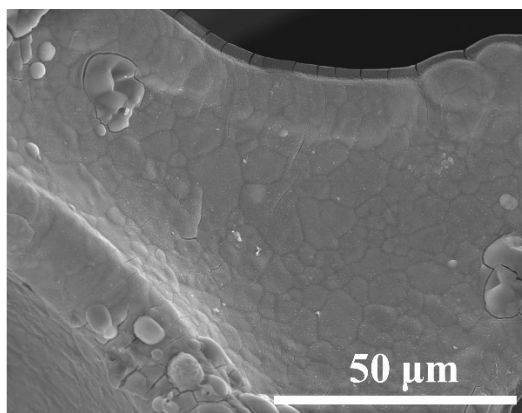

**Fig. S3** SEM image of NiS<sub>x</sub>/NF.

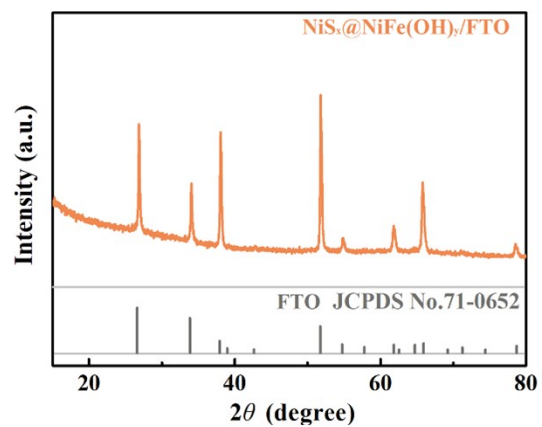

**Fig. S4** XRD pattern of electrodeposited  $\text{NiS}_x@NiFe(OH)_y$  on the fluorine-doped tin oxide ( $\text{NiS}_x@NiFe(OH)_y/FTO$ ).

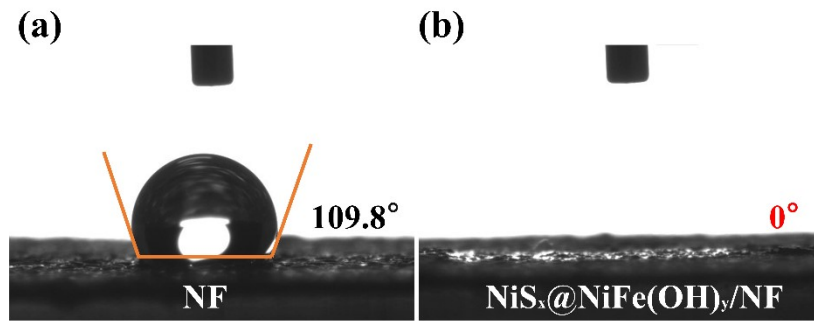

**Fig. S5** The static droplet contact angles for (a) NF and (b) NiS<sub>x</sub>@NiFe(OH)<sub>y</sub>/NF.

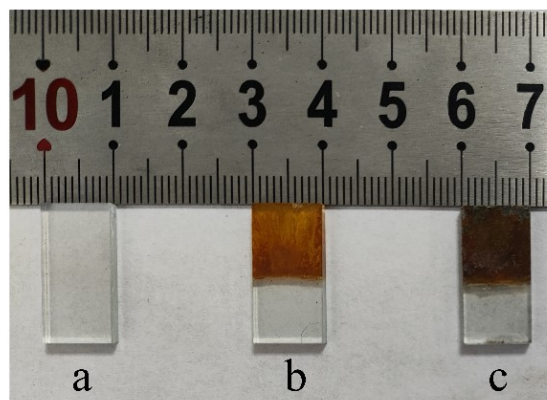

**Fig. S6** The electrode pictures of (a) FTO, (b)  $\text{NiFe(OH)}_y/\text{FTO}$ , (c)  $\text{NiS}_x@\text{NiFe(OH)}_y/\text{FTO}$ .

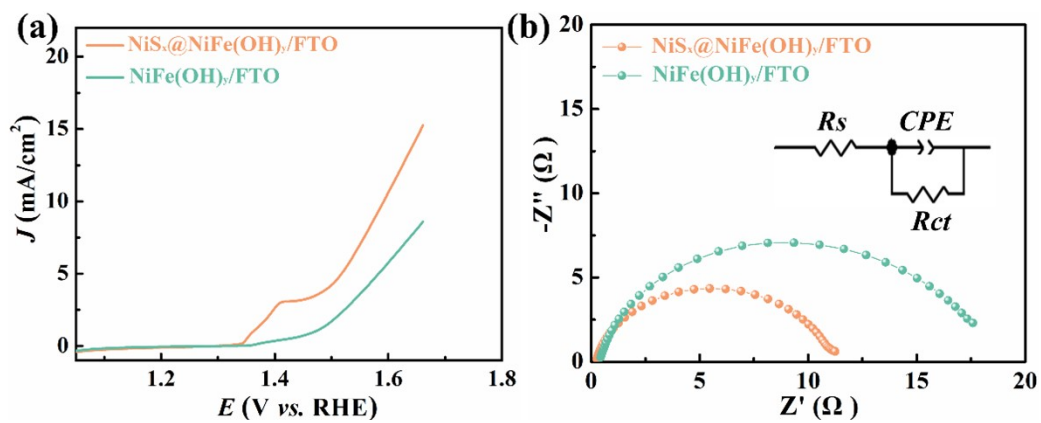

**Fig. S7** OER performance of NiFe(OH)<sub>y</sub>/FTO and NiS<sub>x</sub>@NiFe(OH)<sub>y</sub>/FTO: (a) LSV curves, (b) EIS spectra.



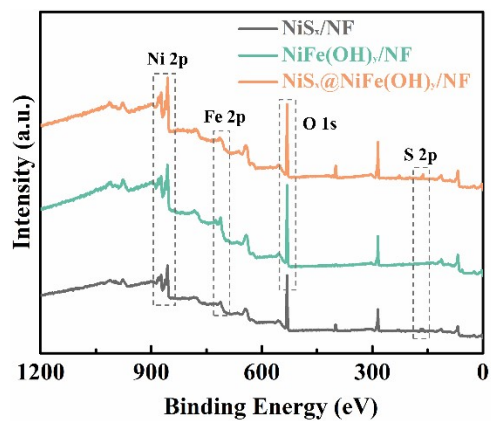

**Fig. S8** survey XPS scan of NiS<sub>x</sub>@NiFe(OH)<sub>y</sub>/NF, NiFe(OH)<sub>y</sub>/NF and NiS<sub>x</sub>/NF.

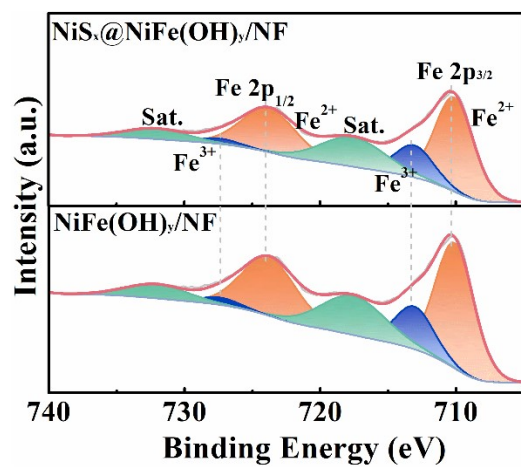

**Fig. S9** High-resolution XPS comparison of Fe 2p for  $\text{NiS}_x@\text{NiFe(OH)}_y/\text{NF}$  and  $\text{NiFe(OH)}_y/\text{NF}$ .

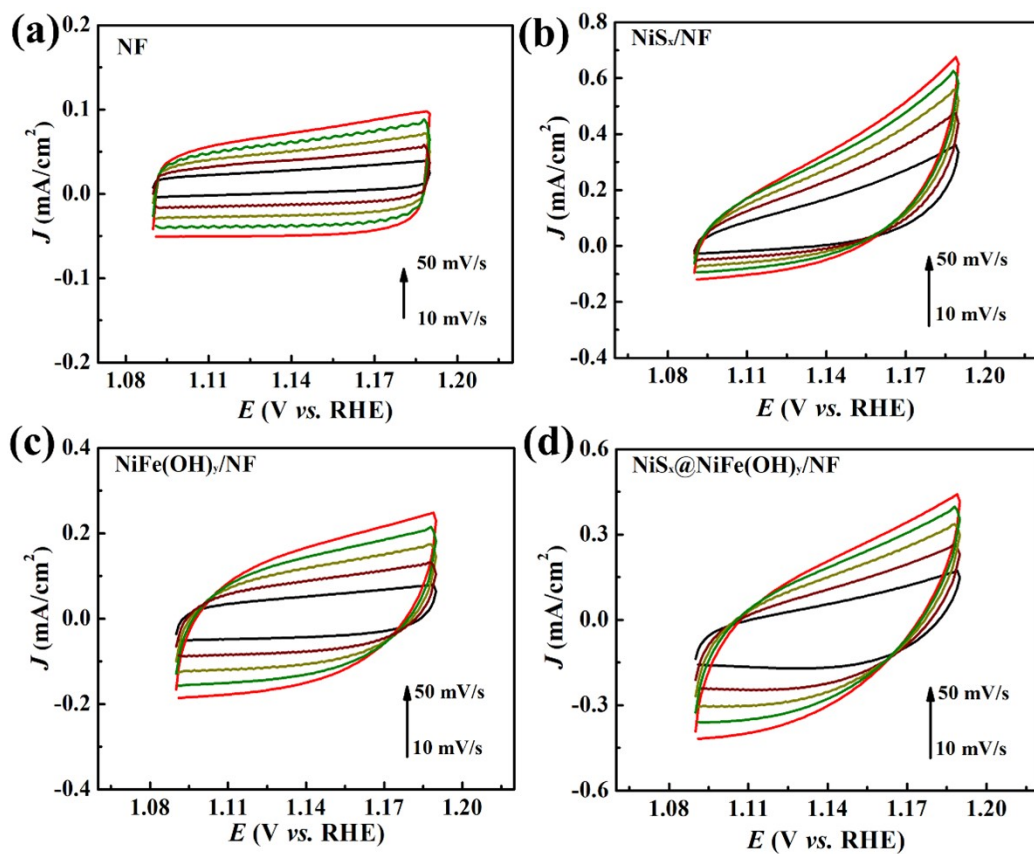

**Fig. S10** CV curves of (a) NF, (b) NiS<sub>x</sub>/NF, (c) NiFe(OH)<sub>y</sub>/NF and (d) NiS<sub>x</sub>@NiFe(OH)<sub>y</sub>/NF at different scan rates (10, 20, 30, 40, and 50 mV/s).

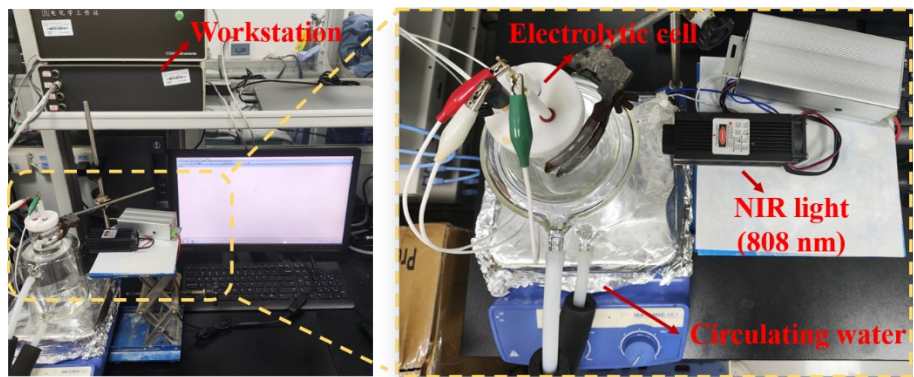

**Fig. S11** The device picture of photothermal effect assist OER.

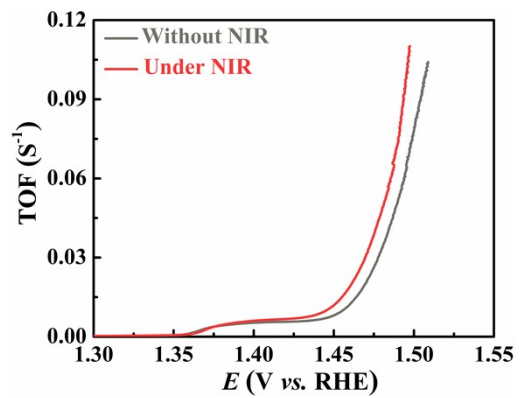

**Fig. S12** TOF values of NiS<sub>x</sub>@NiFe(OH)<sub>y</sub>/NF under and without NIR light.

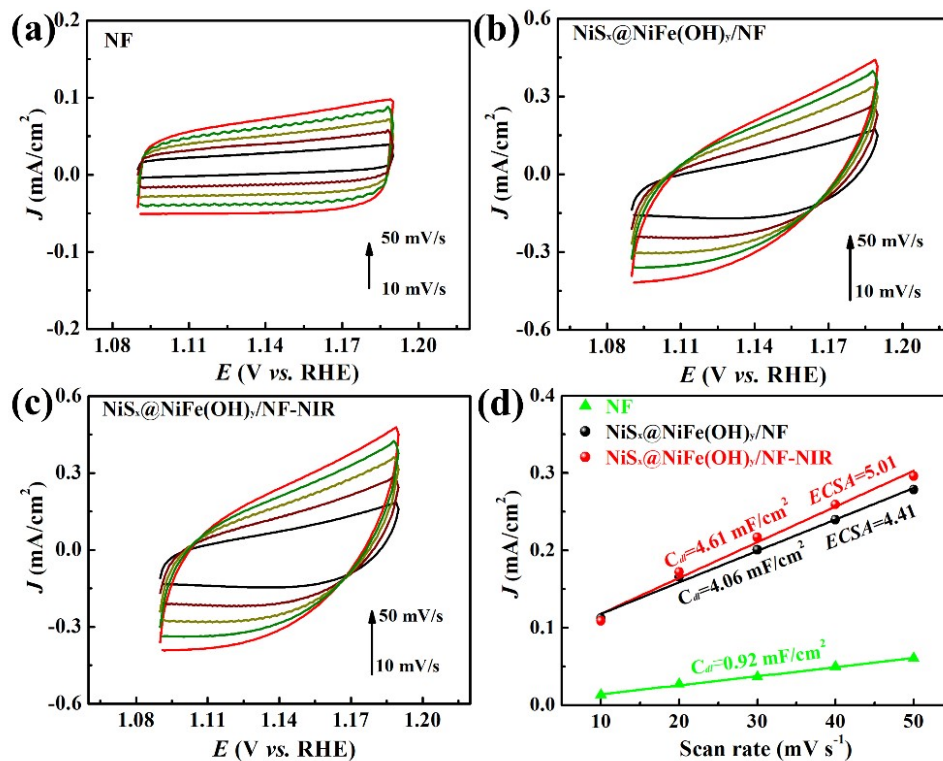

**Fig. S13** CV curves of (a) NF, (b) NiS<sub>x</sub>@NiFe(OH)<sub>y</sub>/NF, (c) NiS<sub>x</sub>@NiFe(OH)<sub>y</sub>/NF-NIR at different scan rates (10, 20, 30, 40, and 50 mV/s). (d) ECSA data of NiS<sub>x</sub>@NiFe(OH)<sub>y</sub>/NF and NiS<sub>x</sub>@NiFe(OH)<sub>y</sub>/NF-NIR.

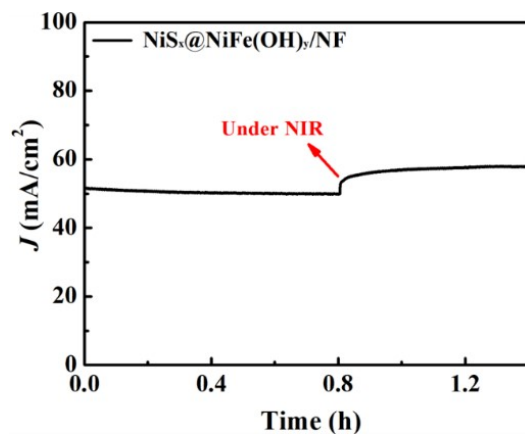

**Fig. S14**  $J$ - $T$  curves of NiS<sub>x</sub>@NiFe(OH)<sub>y</sub>/NF at 1.6 V vs. RHE under and without NIR light.

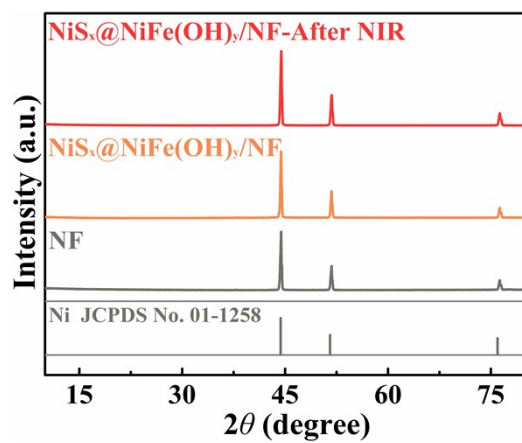

**Fig. S15** XRD patterns of  $\text{NiS}_x@ \text{NiFe}(\text{OH})_y/\text{NF}$  after *J-T* test under NIR light ( $\text{NiS}_x@ \text{NiFe}(\text{OH})_y/\text{NF}$ -After NIR),  $\text{NiS}_x@ \text{NiFe}(\text{OH})_y/\text{NF}$  and NF.



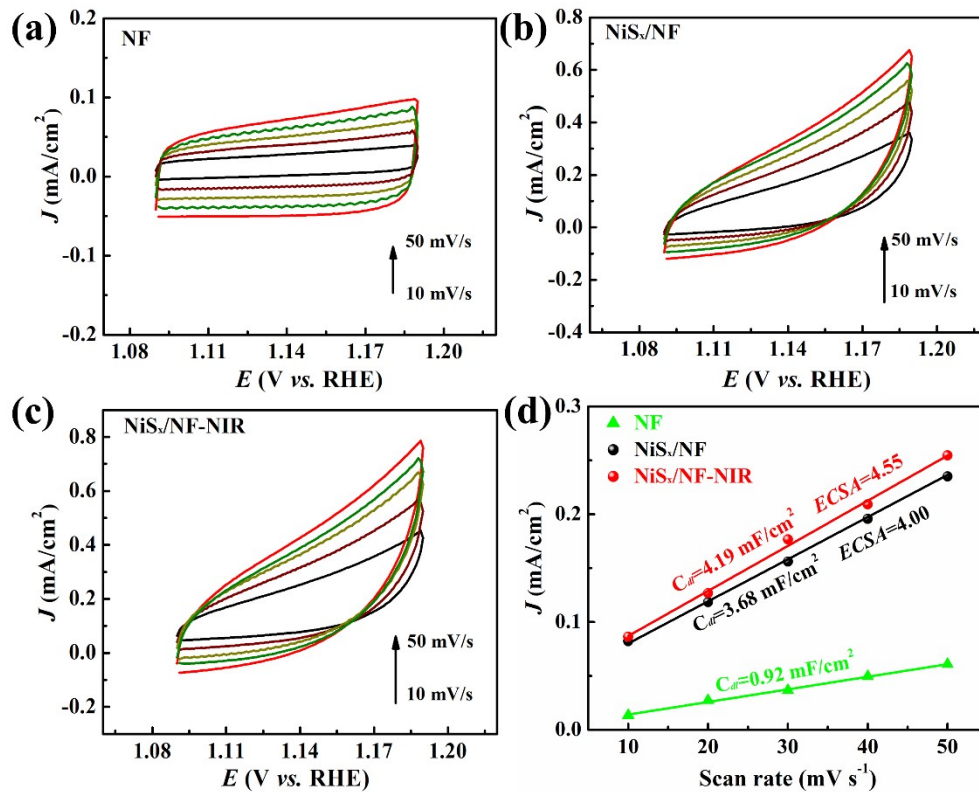

**Fig. S16** CV curves of (a) NF, (b) NiS<sub>x</sub>/NF, (c) NiS<sub>x</sub>/NF-NIR at different scan rates (10, 20, 30, 40, and 50 mV/s). (d) ECSA data of NiS<sub>x</sub>/NF and NiS<sub>x</sub>/NF-NIR.

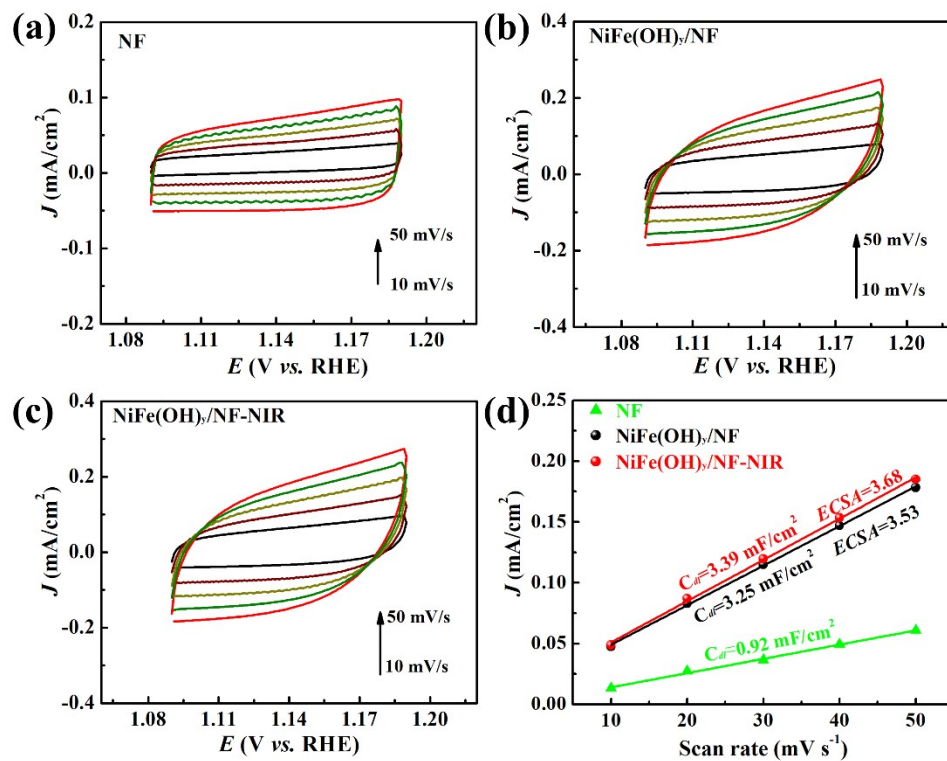

**Fig. S17** CV curves of (a) NF, (b) NiFe(OH)<sub>y</sub>/NF, (c) @NiFe(OH)<sub>y</sub>/NF-NIR at different scan rates (10, 20, 30, 40, and 50 mV/s). (d) ECSA data of NiFe(OH)<sub>y</sub>/NF and NiFe(OH)<sub>y</sub>/NF-NIR.

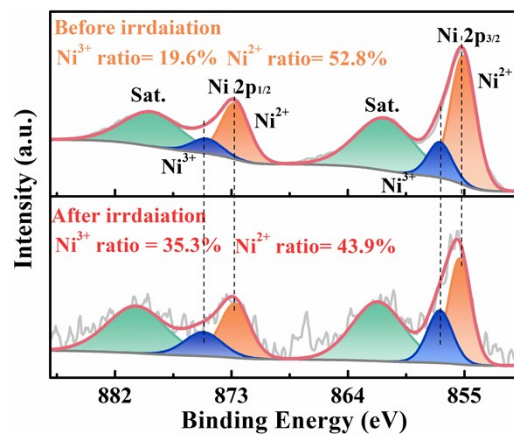

**Fig. S18** High-resolution XPS comparison of Ni 2p in NiS<sub>x</sub>@NiFe(OH)<sub>y</sub>/NF before and after NIR light irradiation.

**Table S1** Tafel slope comparison of NiS<sub>x</sub>@NiFe(OH)<sub>y</sub>/NF to recently reported NiFe-based

Electrocatalysts for OER.

| Electrocatalyst                                                              | Tafel slope (mV dec <sup>-1</sup> ) | Testing condition          | Reference        |
|------------------------------------------------------------------------------|-------------------------------------|----------------------------|------------------|
| <b>NiS<sub>x</sub>@NiFe(OH)<sub>y</sub>/NF</b>                               | <b>38.0</b>                         | <b>1.0 M KOH+NIR light</b> | <b>This work</b> |
| <b>NiS<sub>x</sub>@NiFe(OH)<sub>y</sub>/NF</b>                               | <b>45.1</b>                         | <b>1.0 M KOH</b>           | <b>This work</b> |
| Ni <sub>0.3</sub> Fe <sub>0.7</sub> -LDH@NF                                  | 56.68                               | 1.0 M KOH                  | [1]              |
| NiS/LDH/NF-5                                                                 | 61.2                                | 1.0 M KOH                  | [2]              |
| NiFeB                                                                        | 31.13                               | 1.0 M KOH                  | [3]              |
| NiFe/NiFeOOH                                                                 | 65.0                                | 1.0 M KOH                  | [4]              |
| A-NiFe NS/CuS                                                                | 41                                  | 1.0 M KOH                  | [5]              |
| Fe <sub>2</sub> O <sub>3</sub> /Fe <sub>0.64</sub> Ni <sub>0.36</sub> @C-800 | 82.98                               | 1.0 M KOH                  | [6]              |
| NiFe@C                                                                       | 87.6                                | 1.0 M KOH                  | [7]              |
| NiFe 2-1                                                                     | 58.6                                | 1.0 M KOH                  | [8]              |
| NiFe/NiFe:Pi                                                                 | 38                                  | 1.0 M KOH                  | [9]              |
| fcc-Ni <sub>3</sub> Fe/C                                                     | 72                                  | 1.0 M KOH                  | [10]             |
| Ni <sub>5</sub> P <sub>4</sub> /NiP <sub>2</sub> /NiFe LDH                   | 46.6                                | 1.0 M KOH                  | [11]             |
| NiFe(OH) <sub>x</sub> /NiFe-MOF                                              | 52.05                               | 1.0 M KOH                  | [12]             |
| NiFe/NiFe-OH                                                                 | 41                                  | 1.0 M KOH                  | [13]             |
| NiFe alloy                                                                   | 51.9                                | 1.0 M KOH                  | [14]             |
| FeOOH@Fe <sub>2</sub> O <sub>3</sub> @Ni(OH) <sub>2</sub> /NF                | 60.15                               | 1.0 M KOH                  | [15]             |
| NiFe-HD/pre-NF                                                               | 81                                  | 1.0 M KOH                  | [16]             |

**Table S2.** Fitted Values of the Equivalent Circuit Shown in **Fig. 2d** and **Fig. 4c**.

| Electrode                                       | $R_s$ ( $\Omega$ ) | $R_{ct}$ ( $\Omega$ ) | $CPE$       |
|-------------------------------------------------|--------------------|-----------------------|-------------|
| NF                                              | 2.52 (0.45)        | 3.17 (0.97)           | 0.02 (3.27) |
| NiS <sub>x</sub> /NF                            | 2.37 (0.41)        | 1.15 (2.06)           | 0.13 (4.51) |
| NiFe(OH) <sub>y</sub> /NF                       | 2.60 (0.49)        | 0.61 (3.38)           | 0.08 (8.41) |
| NiS <sub>x</sub> @NiFe(OH) <sub>y</sub> /NF     | 2.14 (0.43)        | 0.50 (4.39)           | 0.24 (8.91) |
| NiS <sub>x</sub> @NiFe(OH) <sub>y</sub> /NF-NIR | 2.10 (0.34)        | 0.44 (3.63)           | 0.22 (8.02) |

**Table S3** The oxygen generation rate on NiS<sub>x</sub>@NiFe(OH)<sub>y</sub>/NF in 1.0 M KOH at 1.6 V vs. RHE for 8 h in the presence and absence of NIR light irradiation (808 nm, 2 W cm<sup>-2</sup>).

| Electrocatalyst                                 | $N_{O_2}$ (mmol h <sup>-1</sup> ) |
|-------------------------------------------------|-----------------------------------|
| NiS <sub>x</sub> @NiFe(OH) <sub>y</sub> /NF     | 0.58                              |
| NiS <sub>x</sub> @NiFe(OH) <sub>y</sub> /NF-NIR | 0.44                              |

## References

- (1) Y. Zhai, X. Ren, Y. Sun, D. Li, B. Wang and S. Liu, *Appl. Catal. B*, 2023, **323**, 122091.
- (2) Z. Wang, X. Mou, D. Li, C. Song and D. Wang, *Int. J. Hydrog. Energy*, 2022, **47**, 38124-38133.
- (3) H. Liao, G. Ni, P. Tan, Y. Liu, K. Chen, G. Wang, M. Liu and J. Pan, *Appl. Catal. B*, 2022, **317**, 121713.
- (4) D. Peng, C. Hu, X. Luo, J. Huang, Y. Ding, W. Zhou, H. Zhou, Y. Yang, T. Yu, W. Lei and C. Yuan, *Small*, 2022, **19**, 2205665.
- (5) H. Gao, W. Sun, X. Tian, J. Liao, C. Ma, Y. Hu, G. Du, J. Yang and C. Ge, *ACS Appl. Mater. Interfaces*, 2022, **14**, 15205-15213.
- (6) F. Zhou, M. Gan, D. Yan, X. Chen and X. Peng, *Small*, 2023, **19**, 2208276.
- (7) X. Wu, F. Yang and G. Shen, *Int. J. Hydrog. Energy*, 2022, **47**, 18955-18962.
- (8) X. An, Q. Hu, W. Zhu, L. Liu, Y. Zhang and J. Zhao, *Appl. Phys. A*, 2021, **127**: 865.
- (9) Y. Li and C. Zhao, *ACS Catal.*, 2017, **7**, 2535-2541.
- (10) G. Wei, Y. Shen, X. Zhao, Y. Wang, W. Zhang and C. An, *Adv. Funct. Mater.*, 2021, **32**, 2109709.
- (11) L. Yu, H. Zhou, J. Sun, I. K. Mishra, D. Luo, F. Yu, Y. Yu, S. Chen and Z. Ren, *J. Mater. Chem. A*, 2018, **6**, 13619-13623.
- (12) D. Liu, H. Xu, C. Wang, C. Ye, R. Yu and Y. Du, *J. Mater. Chem. A*, 2021, **9**, 24670-24676.
- (13) W. Zhu, W. Chen, H. Yu, Y. Zeng, F. Ming, H. Liang and Z. Wang, *Appl. Catal. B*, 2020, **278**, 119326.
- (14) D. Lim, E. Oh, C. Lim, S. E. Shim and S. H. Baeck, *Catal. Today*, 2020, **352**, 27-33.
- (15) M. Tang, X. Liu, A. Ali, Y. He, P. Shen and Y. Ouyang, *J. Colloid Interface Sci.*, 2023, **636**, 501-511.
- (16) B. Wu, Z. Yang, X. Dai, X. Yin, Y. Gan, F. Nie, Z. Ren, Y. Cao, Z. Li and X. Zhang, *Dalton Trans.*, 2021, **50**, 12547-12554.
